# Supplementary material for: MiRNAs, Myostatin, and Muscle MRI Imaging as Biomarkers of Clinical Features in Becker Muscular Dystrophy
Source: PubMed Central journal article supplement (PMC7554733; doi:10.3390/diagnostics10090713), 2020-09-18
Supplement: diagnostics-10-00713-s001.pdf [file diagnostics-10-00713-s001.pdf]

Supplementary Materials:

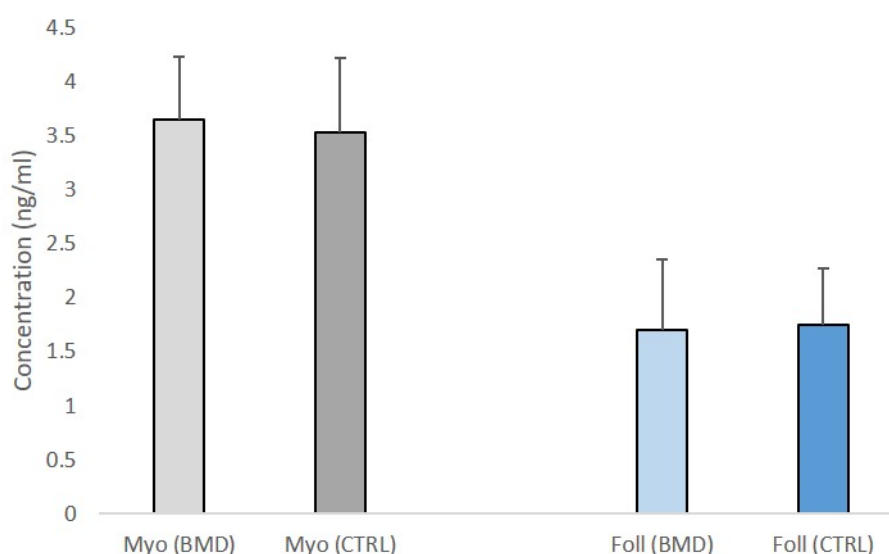

**Figure S1** Myostatin (Myo) and follistatin (Foll) levels in plasma of eight Becker muscular dystrophy (BMD) and six controls. Data were presented as mean + standard deviation.

**Table S1.** TaqMan microRNA primer sequences.

| MiRNA           | Mature miRNA sequence                                                                                               | Assay ID |
|-----------------|---------------------------------------------------------------------------------------------------------------------|----------|
| hsa-miR-1-3p    | UGGAAUGUAAAGAAGUAUGUAU                                                                                              | 002222   |
| hsa-miR-206     | UGGAAUGUAAGGAAGUGUGUGG                                                                                              | 000510   |
| hsa-miR-133a-3p | UUUGGUCCCCUUCAACCAGCUG                                                                                              | 002246   |
| hsa-miR-133b    | UUUGGUCCCCUUCAACCAGCUA                                                                                              | 002247   |
| hsa-miR-155-5p  | UUA AUGCUAAUCGUGAUAGGGGU                                                                                            | 002623   |
| hsa-miR-221     | AGCUACA UUGUCUGCUGGGUUC                                                                                             | 000524   |
| hsa-miR-146b    | UGAGAACUGAAUUC CAUAGGCU                                                                                             | 001097   |
| cel-miR-39-3p   | UCACCGGGUGUAAAUCAGCUUG                                                                                              | 000200   |
| hsa-miR-16      | UAGCAGCACGUAAAUAUUGGCG                                                                                              | 000391   |
| U6 snRNA        | GTGCTCGCTTCGGCAGCACATATACTAAA<br>TTGGAACGATACAGAGAAGATTAGCATGG<br>CCCCTGCCAAGGATGACACGCAAATTCGT<br>GAAGCGTTCATATTTT | 001973   |

**Table S2.** Fatty infiltration with Mercuri score in lower limb muscles.

| <b>BMD Patients</b> | <b>Thigh Muscles</b> |                   | <b>Leg Muscles</b>       |                      |
|---------------------|----------------------|-------------------|--------------------------|----------------------|
|                     | <b>Quadriceps</b>    | <b>Hamstrings</b> | <b>Tibialis Anterior</b> | <b>Gastrocnemius</b> |
| <b>Patient 1</b>    | 3                    | 4                 | 2a                       | 3                    |
| <b>Patient 2</b>    | 3                    | 4                 | 2a                       | 4                    |
| <b>Patient 3</b>    | 0                    | 0                 | 0                        | 0                    |
| <b>Patient 4</b>    | 1                    | 1                 | 0                        | 1                    |
| <b>Patient 5</b>    | N.D.                 | N.D.              | N.D.                     | N.D.                 |
| <b>Patient 6</b>    | 0                    | 0                 | 0                        | 0                    |
| <b>Patient 7</b>    | 1                    | 2a                | 0                        | 1                    |
| <b>Patient 8</b>    | 1                    | 2a                | 0                        | 2a                   |

N.D.: not determined
